# Supplementary material
Source: PubMed Central journal article supplement (PMC5628114)
Supplement: NIHMS882831-supplement-1.pdf [file NIHMS882831-supplement-1.pdf]

## Supplementary Materials

**Title:** Overcoming the Immunosuppressive Tumor Microenvironment of Hodgkin Lymphoma Using Chimeric Antigen Receptor T Cells

**Running title:** CART123 for Hodgkin Lymphoma and the environment

**Authors:** Marco Ruella <sup>1,2,3\*</sup>, Michael Klichinsky <sup>1,3\*</sup>, Saad S. Kenderian <sup>1,4</sup>, Olga Shestova <sup>1,2,3</sup>, Amy Ziober <sup>2,3</sup>, Daniel O. Kraft <sup>1</sup>, Michael Feldman <sup>2,3</sup>, Mariusz A. Wasik <sup>2,3</sup>, Carl H. June <sup>1,2,3,5</sup>, and Saar Gill <sup>1,3,5</sup>

<sup>1</sup> Center for Cellular Immunotherapies, Perelman School of Medicine at the University of Pennsylvania, Philadelphia, PA.

<sup>2</sup> Department of Pathology and Laboratory Medicine, Perelman School of Medicine at the University of Pennsylvania, Philadelphia, PA.

<sup>3</sup> Abramson Cancer Center, University of Pennsylvania, Philadelphia, PA.

<sup>4</sup> Division of Hematology, Department of Internal Medicine, Mayo Clinic, Rochester, MN.

<sup>5</sup> Division of Hematology-Oncology, Department of Medicine, Perelman School of Medicine at the University of Pennsylvania, Philadelphia, PA.

<sup>6</sup> Parker Institute for Cancer Immunotherapy, University of Pennsylvania, Philadelphia, PA

<sup>7</sup> Department of Systems Pharmacology and Translational Therapeutics, Perelman School of Medicine, University of Pennsylvania, Philadelphia, PA

\* = these two authors contributed equally to this paper

### To whom correspondence should be addressed:

Saar Gill, MD, PhD

Smilow Center for Transl. Res., 8-101

3400 Civic Center Boulevard

Philadelphia, PA 19104

Tel: (215) 573-4015

Fax: (215) 573-8590

Email: [saar.gill@uphs.upenn.edu](mailto:saar.gill@uphs.upenn.edu)

## Supplementary Figures

### Figure S1

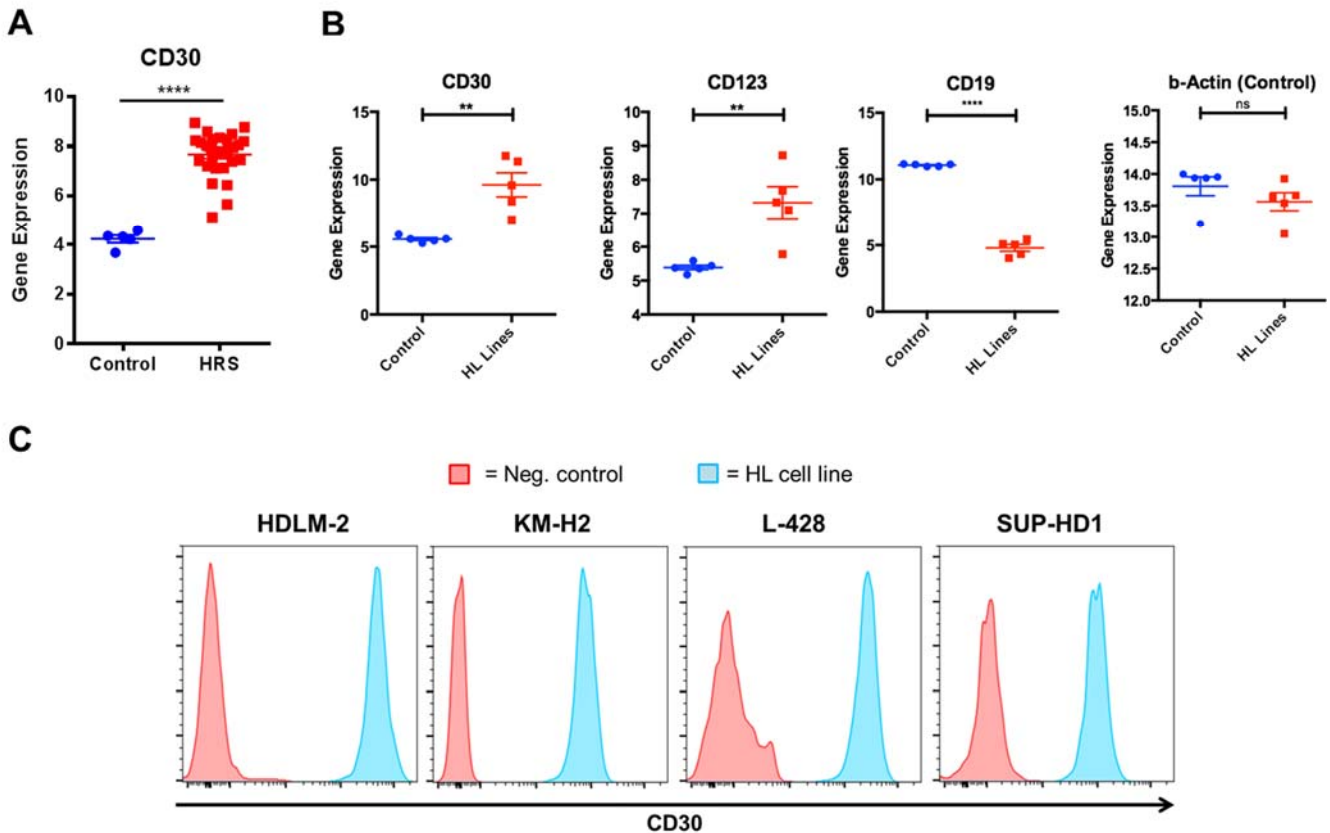

**Figure S1. CD123 and CD30 expression in Hodgkin lymphoma.** **A.** Affymetrix array gene expression analysis of microdissected HRS (GSE-39133, accessible via [www.biogps.org](http://www.biogps.org)) reveals high expression of CD30 in 29 HL patients as compared to 5 controls (microdissected germinal center B cells) **B.** CD30 and CD123, were highly expressed also in HL cell lines by RNA expression analysis (GSE-39132). CD19 and beta-actin are used as controls. **C.** High CD30 protein expression by flow cytometry on 4 standard HL cell lines (HDLM-2, KM-H2, SUP-HD1 and L428).

**Figure S2**

**A**

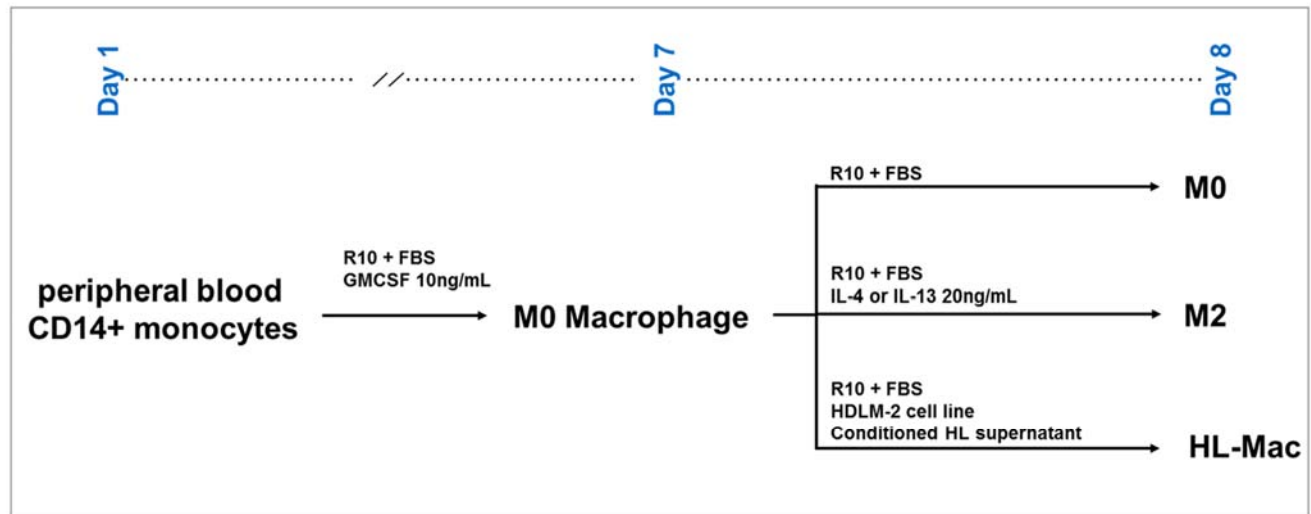

**B**

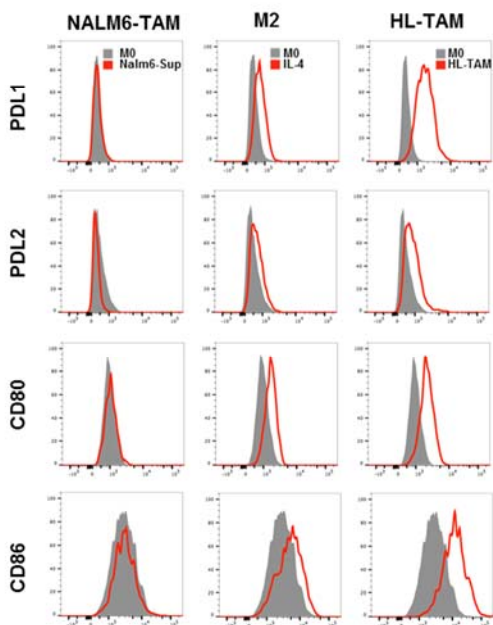

**C**

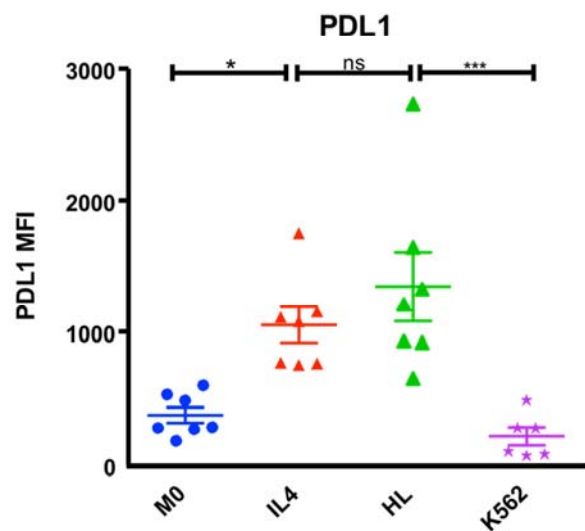

**Figure S2. Hodgkin Lymphoma polarizes normal macrophage to an immunosuppressive phenotype.** **A.** Macrophage differentiation protocol: human macrophages (M0) were generated by differentiating positively selected CD14+ normal donor monocytes for 7 days in RPMI-1640 supplemented with 10% fetal bovine serum, 1x Glutamax, 10ng/mL recombinant human GM-CSF and 1x penicillin/streptomycin. Macrophages were polarized to M2 by adding

either 20ng/mL human IL-4 or IL-13 to the differentiation media for an additional 24 hours. HL-TAMs were generated by culturing macrophages with HDLM-2 cells or using HDLM2 conditioned media for 24 hours post-differentiation. **B.** Expression of CD80, CD86, PD-L1 and PD-L2 in macrophages polarized using IL-4 (M2), NALM-6 (control) or HDLM-2 cells. HL-polarized macrophages share similar phenotype as the IL-4 polarized macrophages. **C.** PD-L1 is highly expressed on M2 and HL-polarized macrophages as compared to M0 or macrophages co-cultured with a non-HL cell line (K562).

**Figure S3**

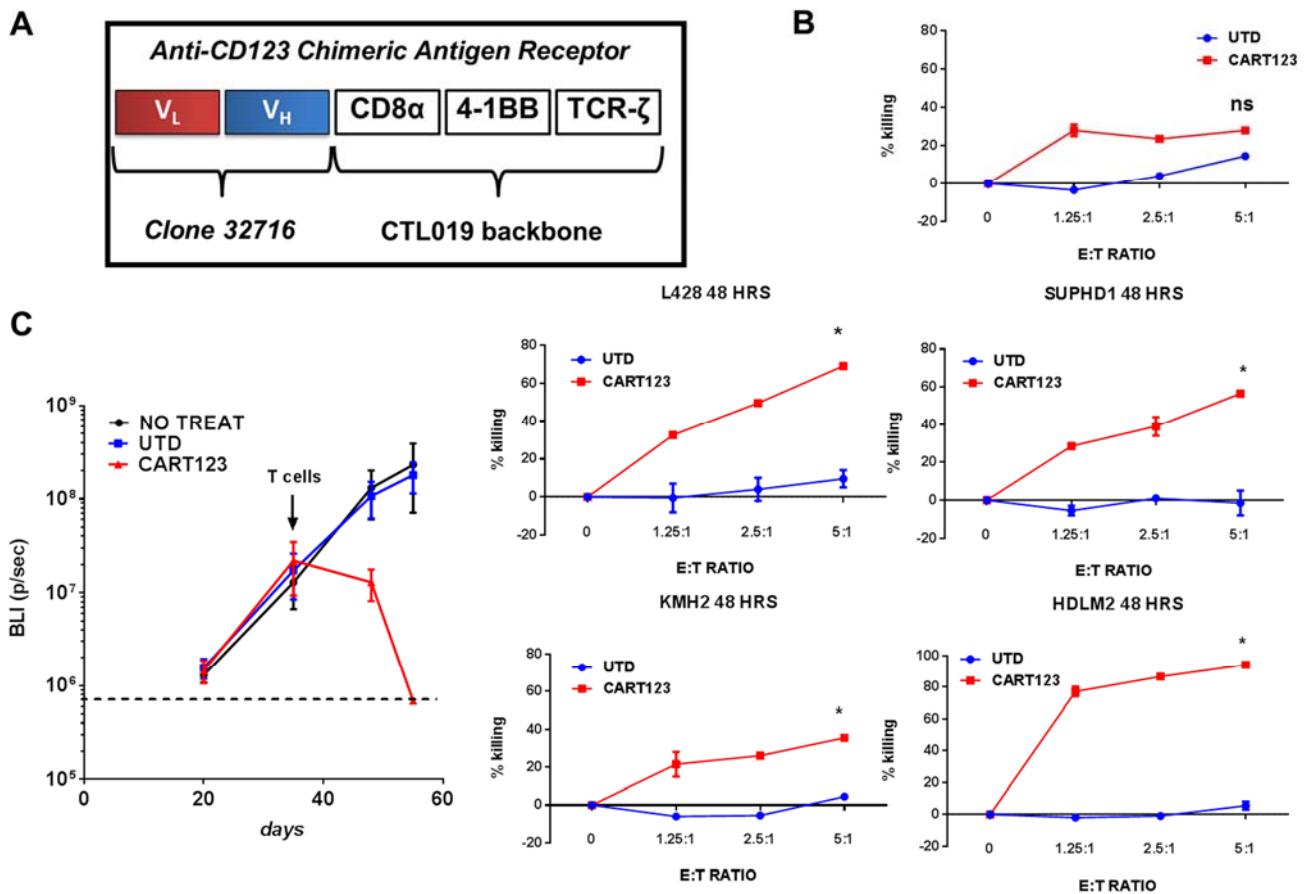

**Figure S3. Anti-lymphoma activity of CART123** **A.** The anti-CD123 chimeric antigen receptor construct: we used a 2<sup>nd</sup> generation anti-CD123 chimeric antigen receptor (CAR123) that features an anti-CD123 scFv (clone 32716), CD8 hinge, 4-1BB costimulatory domain and

CD3- $\zeta$  signaling domain. (1) **B.** CART123, but not UTD, exert potent cytotoxicity (luciferase-based killing assay) against 4 HL cells (HDLM-2, KM-H2, SUP-HD1 and L428) in a dose-dependent manner. **C.** CART123 exert potent anti-HL activity in vivo. Experiment schema:  $2 \times 10^6$  Luciferase-positive SUP-HD1 cells were injected i.v. in NSG mice and tumor engraftment was monitored by bioluminescence imaging. At day 21 mice were randomized to receive no treatment,  $4 \times 10^6$  control untransduced T cells (UTD) or  $4 \times 10^6$  CART123 (10 mice per group) Mice receiving CART123, but not controls, experienced complete response.

**Figure S4**

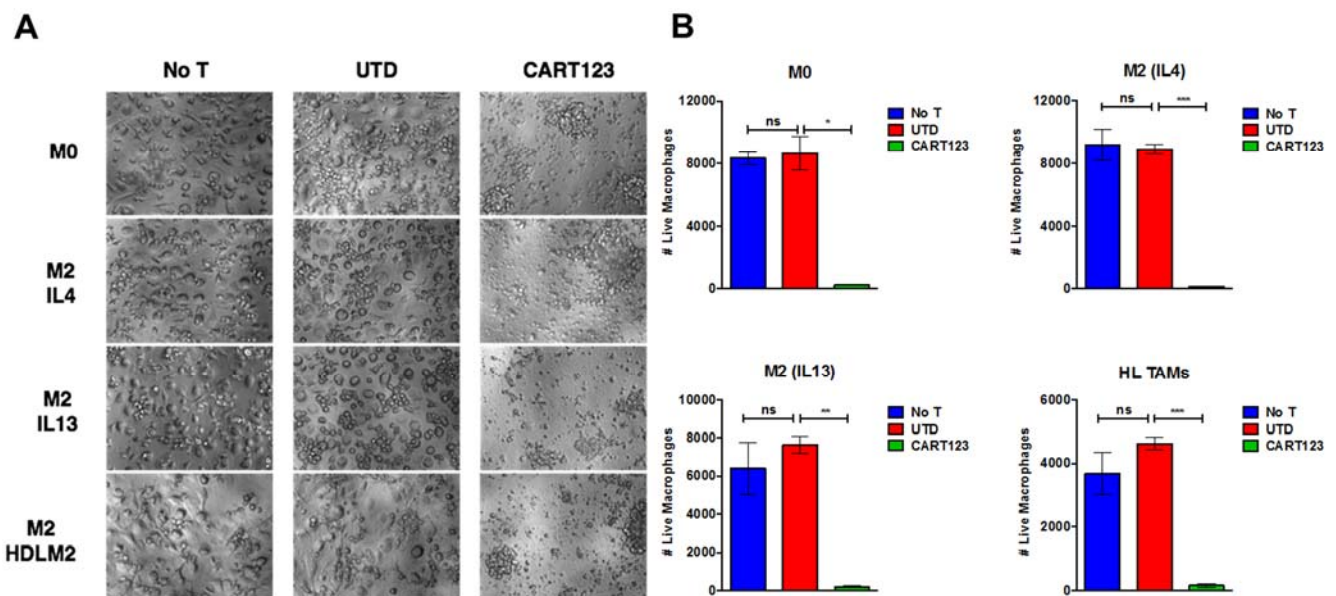

**Figure S4. CART123 efficiently kill macrophages.** **A.** Primary human monocyte derived macrophages were differentiated and polarized as described above. Autologous macrophages were co-cultured with untransduced (UTD) T cells, CART123, or media alone for 7 days at an E:T ratio of 1:1 in a 96-well plate. All conditions were tested in triplicate. At the end of a 7 day co-culture period, killing was assessed by 10x phase microscopy. **B.** Absolute macrophage counts were determined by flow cytometry using CountBright Absolute Counting Beads (Thermo Fisher). Live macrophages were identified as CD11b<sup>+</sup> and LiveDeadAqua-negative.

## References

1. Gill S, Tasian SK, Ruella M, Shestova O, Li Y, Porter DL, et al. Preclinical targeting of human acute myeloid leukemia and myeloablation using chimeric antigen receptor-modified T cells. *Blood*. 2014;123:2343-54.
